# Supplementary material for: Dehydration of Niclosamide Monohydrate Polymorphs: Different Mechanistic Pathways to the Same Product
Source: PubMed Central journal article supplement (PMC10950297; doi:10.1021/acs.cgd.3c00322), 2023-06-02
Supplement: cg3c00322_si_001.pdf [file cg3c00322_si_001.pdf]

## Supporting Information

### Dehydration of Niclosamide Monohydrate Polymorphs: Different Mechanistic Pathways to the Same Product

Jen E. Mann, Renee Gao, and Jennifer A. Swift\*

Georgetown University, Department of Chemistry, Washington, DC 20057-1227

| Table of Contents                                                                                                                                                                                                                                                                                                                                                                                                                                                                  | Page |
|------------------------------------------------------------------------------------------------------------------------------------------------------------------------------------------------------------------------------------------------------------------------------------------------------------------------------------------------------------------------------------------------------------------------------------------------------------------------------------|------|
| <b>Figure S1.</b> Optical images of (left) H <sub>A</sub> and (right) H <sub>B</sub> taken at the same magnification. Both monohydrates exhibit a needle-like morphology. H <sub>A</sub> crystallizes as fine needles, while H <sub>B</sub> crystallizes as clusters of thick needles. Scale bars = 500 μm.                                                                                                                                                                        | 3    |
| <b>Figure S2.</b> DSC curves of heat flow vs. temperature for H <sub>A</sub> samples that were (A) ground with a mortar and pestle and (B) unground. DSC samples were heated at 5 °C/min to 250 °C in aluminum pans with unsealed lids.                                                                                                                                                                                                                                            | 3    |
| <b>Figure S3.</b> Change in peak intensity for (130), (042), (113), and (112) diffraction lines with temperature. From 22 to 75 °C, the peaks decrease by 5.0%, 6.1%, 6.4% and 18.5%, respectively.                                                                                                                                                                                                                                                                                | 4    |
| <b>Figure S4.</b> Change in cell volume and beta angle of the H <sub>A</sub> (and/or H*) lattice from 22 to 150 °C determined from Pawley refinement of sPXRD data.                                                                                                                                                                                                                                                                                                                | 4    |
| <b>Figure S5.</b> Contour plots of two additional H <sub>A</sub> dehydration experiments performed under similar heating conditions. (Left) H <sub>A</sub> was heated to 150 °C and held isothermally for 30 minutes. H* remained stable. (Right) The H* to F1 conversion occurred below 150 °C.                                                                                                                                                                                   | 5    |
| <b>Table S1.</b> Regression parameters associated with different solid state reaction models for isothermal TGA data (40, 45, and 50 °C) for H <sub>A</sub> (ground). Reaction models with the highest statistical fit are indicated, with R <sup>2</sup> > 0.99 in red.                                                                                                                                                                                                           | 6    |
| <b>Figure S6.</b> (A) Summary of E <sub>a</sub> determination from three runner-up model-based kinetic analyses of isothermal TGA data on H <sub>A</sub> collected at 40, 45 and 50°C. (B) Arrhenius plot. All four models with the highest R <sup>2</sup> coefficients yielded similar E <sub>a</sub> values. (C) E <sub>a</sub> vs. alpha calculated from the model-free Friedman analysis method. (D) E <sub>a</sub> vs. alpha calculated using the standard model-free method. | 7    |
| <b>Figure S7.</b> TGA of ground H <sub>B</sub> in open pans heated at 5 °C/min.                                                                                                                                                                                                                                                                                                                                                                                                    | 7    |

**Figure S8.** Change in cell volume and beta angle of the H<sub>B</sub> lattice from 25 to 120 °C determined from Pawley refinement of sPXRD data. **8**

**Figure S9.** Fraction dehydrated ( $\alpha$ ) vs. time plots for H<sub>B</sub> based on triplicate isothermal TGA data collected at 40, 45 and 50 °C. Inset plot is an expanded view of the data from 0 – 100 min. All samples were ground and heated at 5 °C/min. **8**

**Table S2.** Regression parameters associated with different solid state reaction models for isothermal TGA data (40, 45, and 50 °C) for H<sub>B</sub> (ground). Reaction models with the highest statistical fit are indicated, with  $R^2 > 0.99$  in red. Ones with  $R^2 > 0.999$  are in bold. **9**

**Figure S10.** (A) Summary of  $E_a$  determination from two runner-up model-based kinetic analyses of isothermal TGA data on H<sub>B</sub> collected at 40, 45 and 50°C. (B) Arrhenius plot. All models with  $R^2 > 0.99$  coefficients yielded similar  $E_a$  values. (C)  $E_a$  vs. alpha calculated from the model-free Friedman analysis method. (D)  $E_a$  vs. alpha calculated using the standard model-free method. **10**

**Figure S11.** sPXRD of three different ground batches of H<sub>B</sub> compared against the PXRD patterns of HB and F1 simulated from the single crystal structures. (left) A zoomed view of the region where high intensity peaks would be expected if F1 was present in the samples. **11**

**Figure S12.** Hot-stage microscopy optical images of H<sub>B</sub> ramped at 5 °C/min from room temperature to 150 °C. At approximately 95 °C dark spots begin to appear across the surface until 140 °C whereupon optical changes can no longer be observed. Scale bar = 100  $\mu$ m. **11**

**Figure S13.** (left) Calculated BFDH morphology and (right) top ten slip planes calculated using the CSD-Particle module in the Cambridge Structural Database. None of the calculated slip planes correspond to the natural faces. **12**

**Figure S14.** Schematic of packing in H<sub>B</sub> and F1. Each NCL molecule is colored so that the nitrophenyl ring is orange and the phenol ring is light blue. Water molecules in H<sub>B</sub> are dark blue. **12**

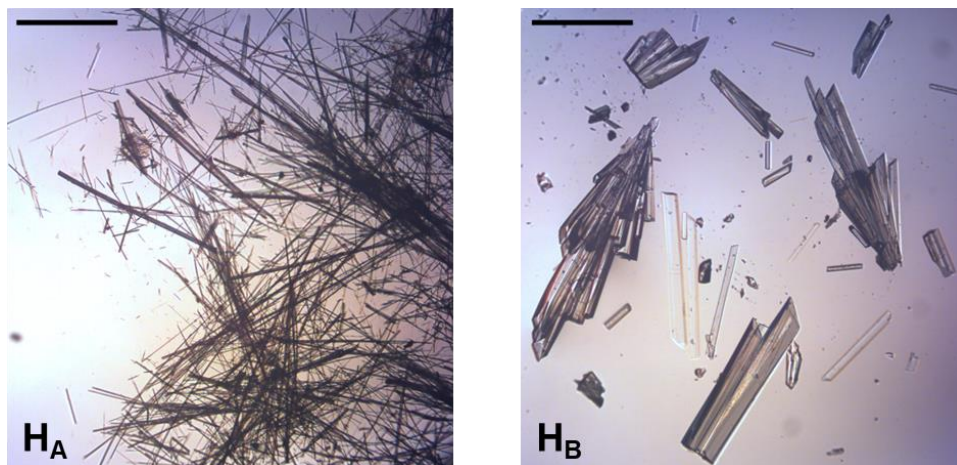

**Figure S1.** Optical images of (left) H<sub>A</sub> and (right) H<sub>B</sub> taken at the same magnification. Both monohydrates exhibit a needle-like morphology. H<sub>A</sub> crystallizes as fine needles, while H<sub>B</sub> crystallizes as clusters of thick needles. Scale bars = 500  $\mu$ m.

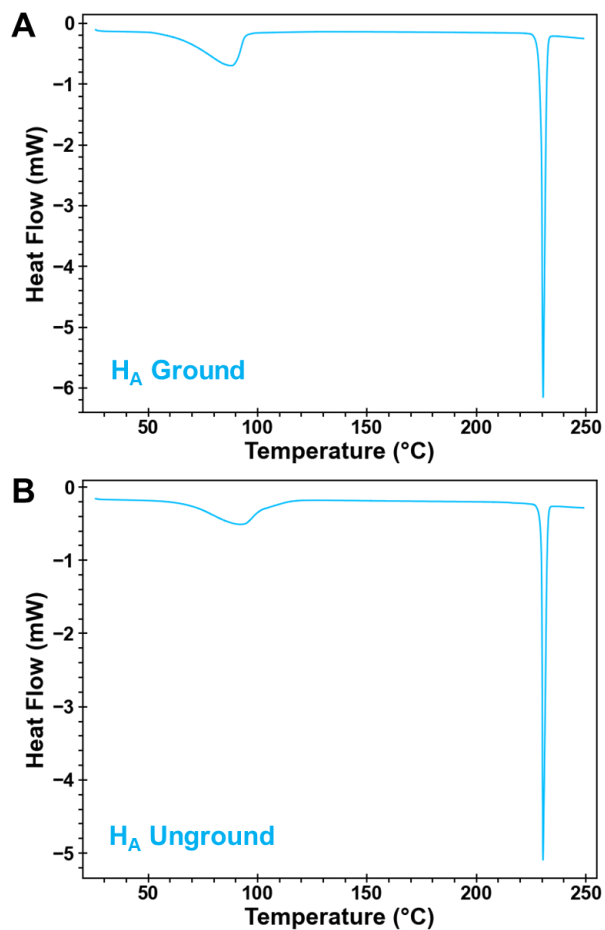

**Figure S2.** DSC curves of heat flow vs. temperature for H<sub>A</sub> samples that were (A) ground with a mortar and pestle and (B) unground. DSC samples were heated at 5  $^{\circ}$ C/min to 250  $^{\circ}$ C in aluminum pans with unsealed lids.

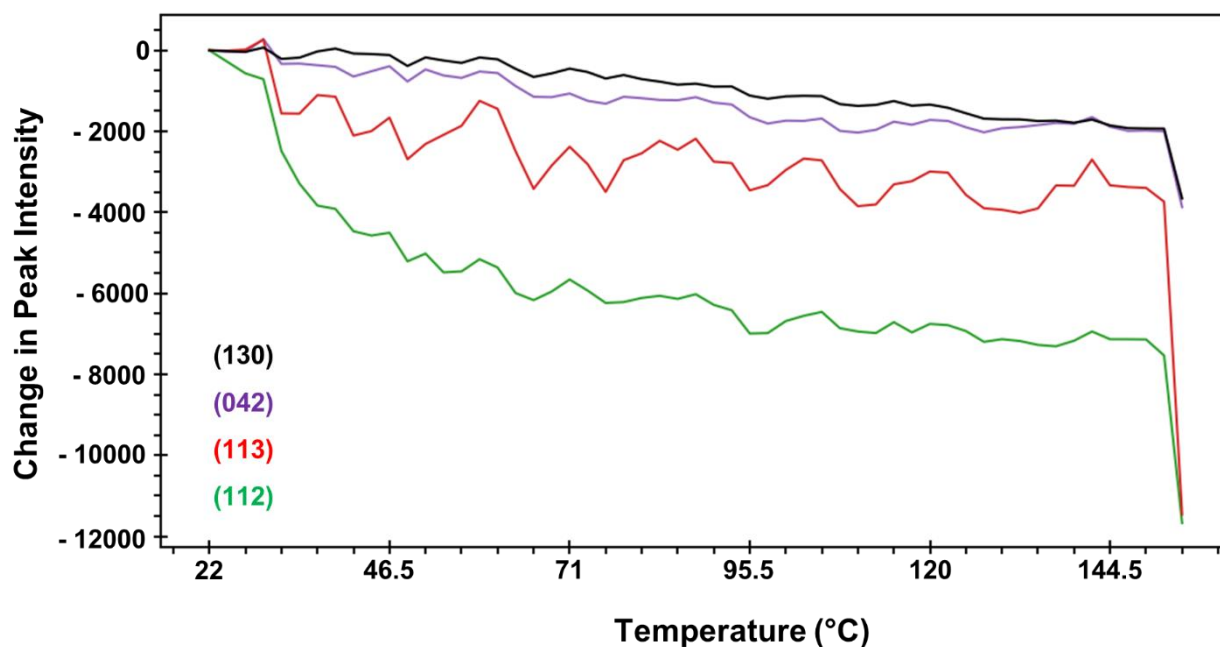

**Figure S3.** Change in peak intensity for (130), (042), (113), and (112) diffraction lines with temperature. From 22 to 75 °C, the peaks decrease by 5.0%, 6.1%, 6.4% and 18.5%, respectively.

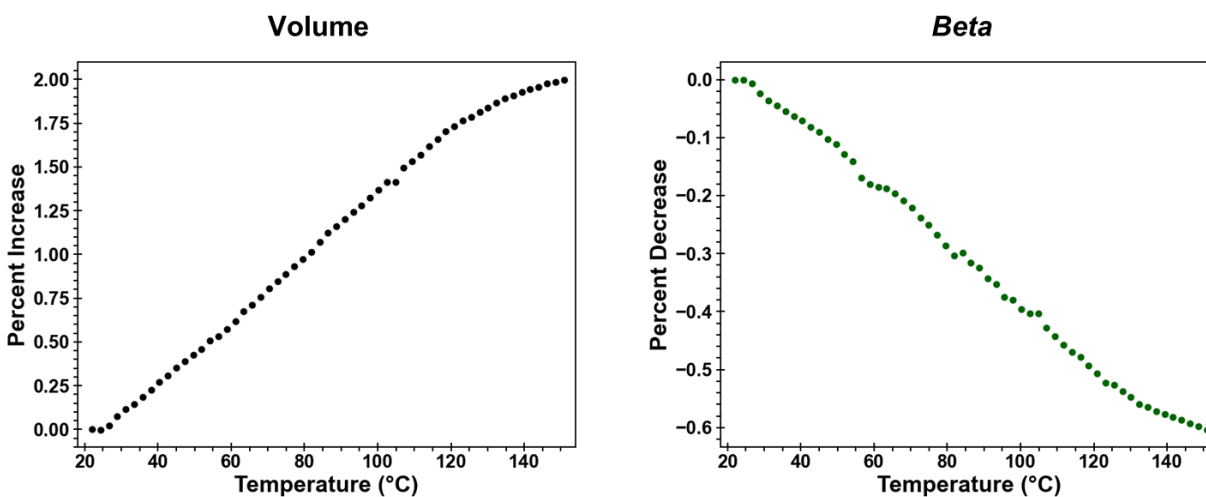

**Figure S4.** Change in cell volume and beta angle of the  $H_A$  (and/or  $H^*$ ) lattice from 22 to 150 °C determined from Pawley refinement of sPXRD data.

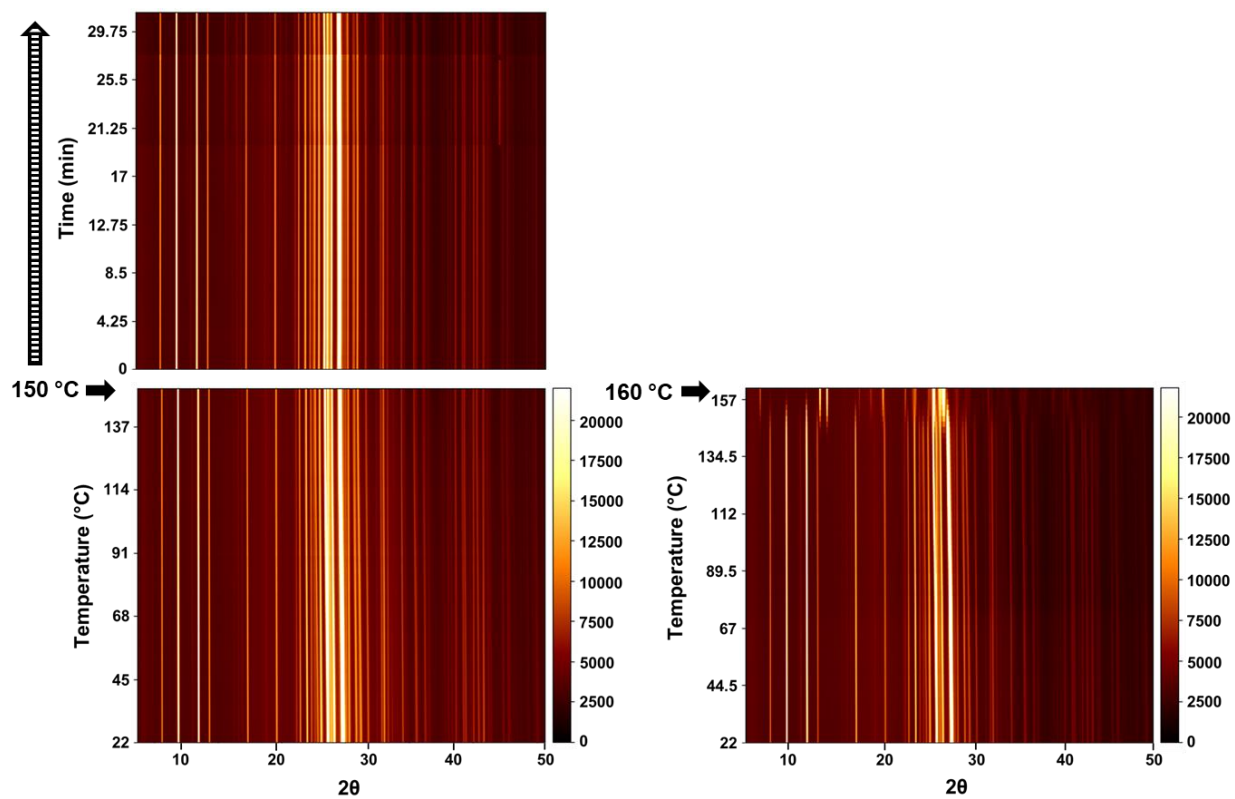

**Figure S5.** Contour plots of two additional  $H_A$  dehydration experiments performed under similar heating conditions. (Left)  $H_A$  was heated to 150 °C and held isothermally for 30 minutes.  $H^*$  remained stable. (Right) The  $H^*$  to F1 conversion occurred below 150 °C.

**Table S1.** Regression parameters associated with different solid state reaction models for isothermal TGA data (40, 45, and 50 °C) for H<sub>A</sub> (ground). Reaction models with the highest statistical fit are indicated, with R<sup>2</sup> > 0.99 in red.

|                                                               | 40 °C   | 45 °C   | 50 °C   |
|---------------------------------------------------------------|---------|---------|---------|
| <b>Nucleation Models</b>                                      |         |         |         |
| 1D growth of nuclei (Avrami-Erofeyev Eq, n = 2) ( <b>A2</b> ) | 0.99525 | 0.99487 | 0.99584 |
| 2D growth of nuclei (Avrami-Erofeyev Eq, n = 3) ( <b>A3</b> ) | 0.98554 | 0.98414 | 0.98482 |
| 3D growth of nuclei (Avrami-Erofeyev Eq, n = 4) ( <b>A4</b> ) | 0.97760 | 0.97573 | 0.97624 |
| Random nucleation (Prout-Tompkins Eq) ( <b>B1</b> )           | 0.98836 | 0.98719 | 0.98794 |
| Power law (n = 1/2) ( <b>P2</b> )                             | 0.93286 | 0.92775 | 0.92840 |
| Power law (n = 1/3) ( <b>P3</b> )                             | 0.91164 | 0.90591 | 0.90649 |
| Power law (n = 1/4) ( <b>P4</b> )                             | 0.89966 | 0.89360 | 0.89415 |
| <b>Geometrical Contraction Models</b>                         |         |         |         |
| 2D phase boundary (Contracting area) ( <b>R2</b> )            | 0.99701 | 0.99687 | 0.99800 |
| 3D phase boundary (Contracting volume) ( <b>R3</b> )          | 0.99688 | 0.99788 | 0.99906 |
| <b>Diffusion Models</b>                                       |         |         |         |
| 1D diffusion ( <b>D1</b> )                                    | 0.99194 | 0.99307 | 0.99419 |
| 2D diffusion ( <b>D2</b> )                                    | 0.97794 | 0.98209 | 0.98305 |
| 3D diffusion (Jander Eq) ( <b>D3</b> )                        | 0.93565 | 0.94428 | 0.94470 |
| 3D Diffusion (Ginstling-Brounshtein Eq) ( <b>D4</b> )         | 0.96644 | 0.97206 | 0.97287 |
| <b>Reaction Order Models</b>                                  |         |         |         |
| Zero-order ( <b>R1</b> )                                      | 0.97565 | 0.97243 | 0.97339 |
| First-order ( <b>F1</b> )                                     | 0.98393 | 0.98746 | 0.98865 |
| Second-order ( <b>F2</b> )                                    | 0.85251 | 0.86649 | 0.86627 |
| Third-order ( <b>F3</b> )                                     | 0.66572 | 0.69136 | 0.68855 |

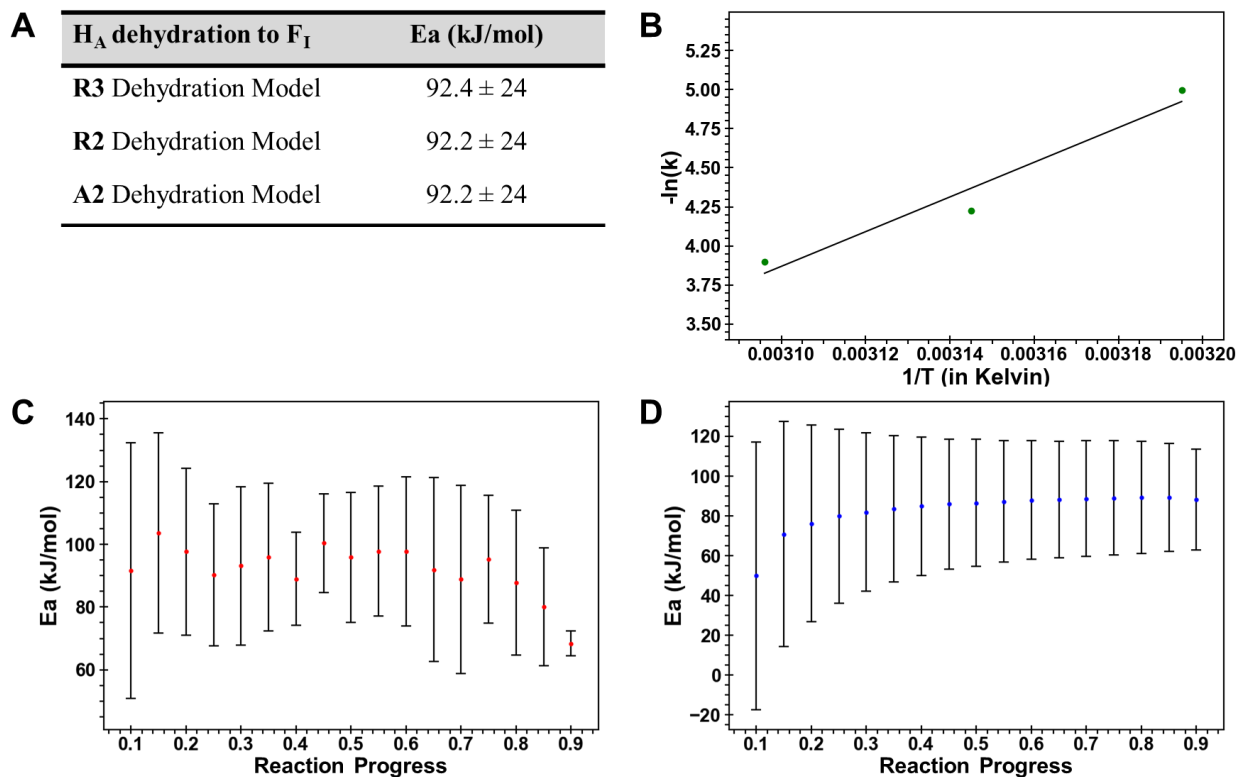

**Figure S6.** (A) Summary of  $E_a$  determination from three runner-up model-based kinetic analyses of isothermal TGA data on  $H_A$  collected at 40, 45 and 50°C. (B) Arrhenius plot. All four models with the highest  $R^2$  coefficients yielded similar  $E_a$  values. (C)  $E_a$  vs. alpha calculated from the model-free Friedman analysis method. (D)  $E_a$  vs. alpha calculated using the standard model-free method.

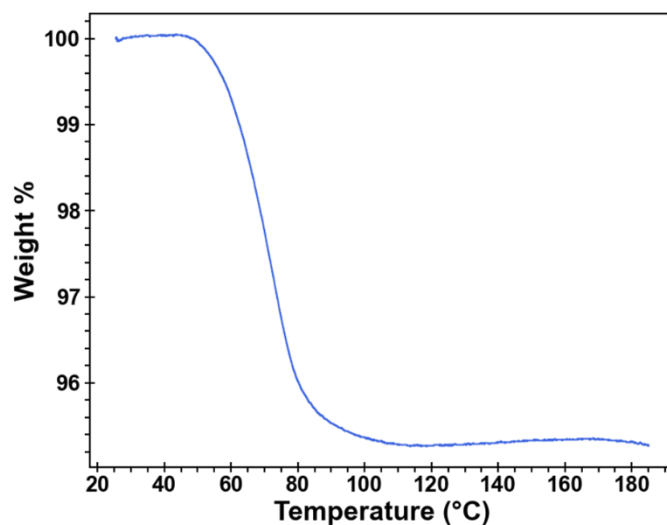

**Figure S7.** TGA of ground  $H_B$  in open pans heated at 5 °C/min.

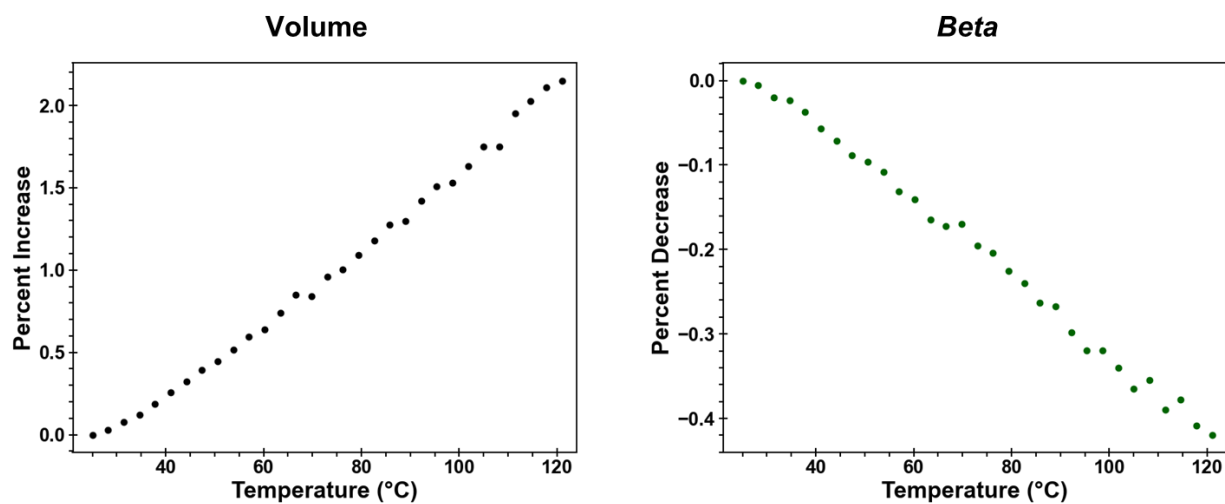

**Figure S8.** Change in cell volume and beta angle of the  $H_B$  lattice from 25 to 120 °C determined from Pawley refinement of sPXRD data.

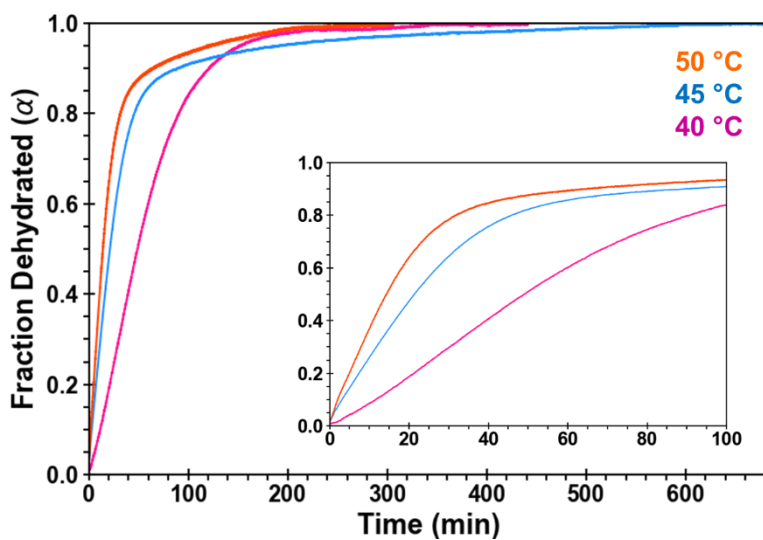

**Figure S9.** Fraction dehydrated ( $\alpha$ ) vs. time plots for  $H_B$  based on triplicate isothermal TGA data collected at 40, 45 and 50 °C. Inset plot is an expanded view of the data from 0 – 100 min. All samples were ground and heated at 5 °C/min.



**Table S2.** Regression parameters associated with different solid state reaction models for isothermal TGA data (40, 45, and 50 °C) for H<sub>B</sub> (ground). Reaction models with the highest statistical fit are indicated, with R<sup>2</sup> > 0.99 in red. Ones with R<sup>2</sup> > 0.999 are in bold.

|                                                               | 40 °C          | 45 °C          | 50 °C          |
|---------------------------------------------------------------|----------------|----------------|----------------|
| <b>Nucleation Models</b>                                      |                |                |                |
| 1D growth of nuclei (Avrami-Erofeyev Eq, n = 2) ( <b>A2</b> ) | <b>0.99551</b> | 0.98342        | 0.98556        |
| 2D growth of nuclei (Avrami-Erofeyev Eq, n = 3) ( <b>A3</b> ) | 0.98544        | 0.96816        | 0.97131        |
| 3D growth of nuclei (Avrami-Erofeyev Eq, n = 4) ( <b>A4</b> ) | 0.97800        | 0.95825        | 0.96199        |
| Random nucleation (Prout-Tompkins Eq) ( <b>B1</b> )           | 0.98756        | 0.97178        | 0.97473        |
| Power law (n = 1/2) ( <b>P2</b> )                             | 0.95525        | 0.92620        | 0.93163        |
| Power law (n = 1/3) ( <b>P3</b> )                             | 0.93763        | 0.90561        | 0.91217        |
| Power law (n = 1/4) ( <b>P4</b> )                             | 0.92753        | 0.89409        | 0.90125        |
| <b>Geometrical Contraction Models</b>                         |                |                |                |
| 2D phase boundary (Contracting area) ( <b>R2</b> )            | <b>0.99919</b> | <b>0.99180</b> | <b>0.99289</b> |
| 3D phase boundary (Contracting volume) ( <b>R3</b> )          | <b>0.99909</b> | <b>0.99573</b> | <b>0.99642</b> |
| <b>Diffusion Models</b>                                       |                |                |                |
| 1D diffusion ( <b>D1</b> )                                    | 0.98996        | <b>0.99368</b> | <b>0.99312</b> |
| 2D diffusion ( <b>D2</b> )                                    | 0.97509        | 0.98915        | 0.98804        |
| 3D diffusion (Jander Eq) ( <b>D3</b> )                        | 0.94598        | 0.97205        | 0.97073        |
| 3D Diffusion (Ginstling-Brounshtein Eq) ( <b>D4</b> )         | 0.96649        | 0.98471        | 0.98349        |
| <b>Reaction Order Models</b>                                  |                |                |                |
| Zero-order ( <b>R1</b> )                                      | 0.98851        | 0.96955        | 0.97224        |
| First-order ( <b>F1</b> )                                     | <b>0.99300</b> | <b>0.99786</b> | <b>0.99794</b> |
| Second-order ( <b>F2</b> )                                    | 0.92988        | 0.95964        | 0.95921        |
| Third-order ( <b>F3</b> )                                     | 0.82239        | 0.87390        | 0.87413        |

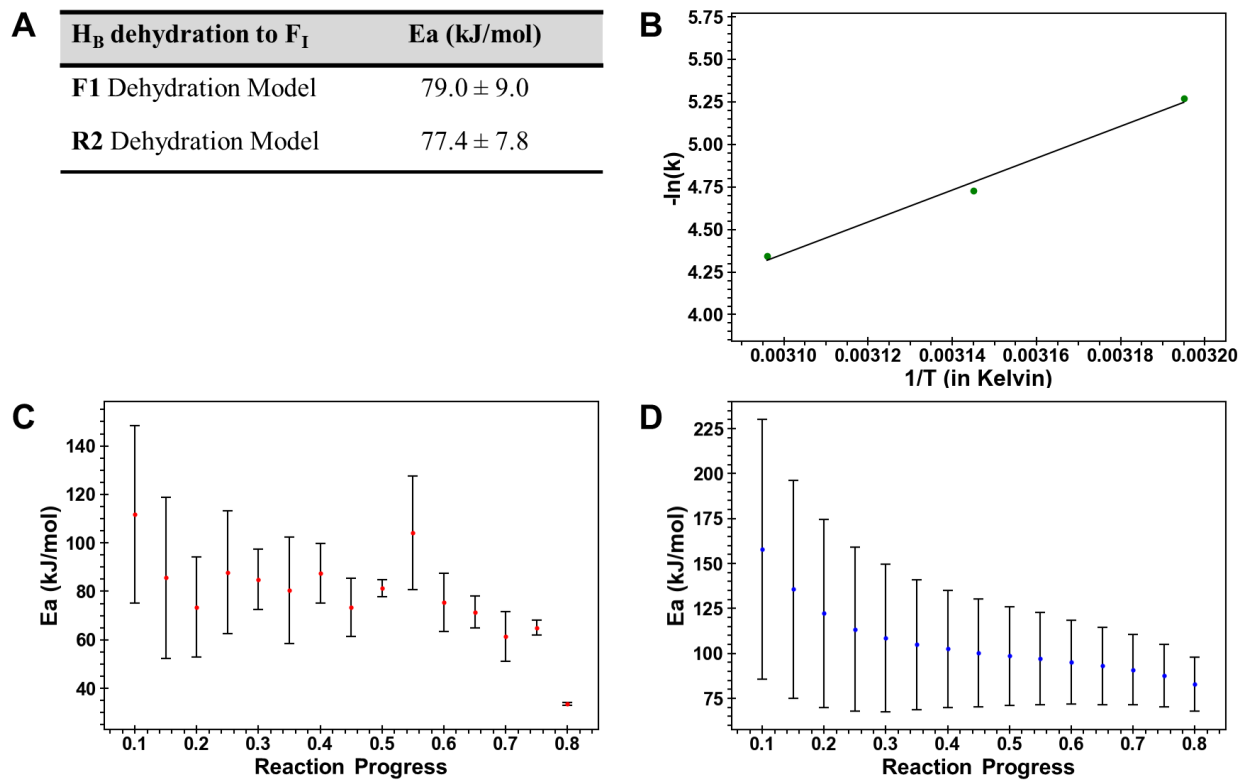

**Figure S10.** (A) Summary of  $E_a$  determination from two runner-up model-based kinetic analyses of isothermal TGA data on  $H_B$  collected at 40, 45 and 50°C. (B) Arrhenius plot. All models with  $R^2 > 0.99$  coefficients yielded similar  $E_a$  values. (C)  $E_a$  vs.  $\alpha$  calculated from the model-free Friedman analysis method. (D)  $E_a$  vs.  $\alpha$  calculated using the standard model-free method.

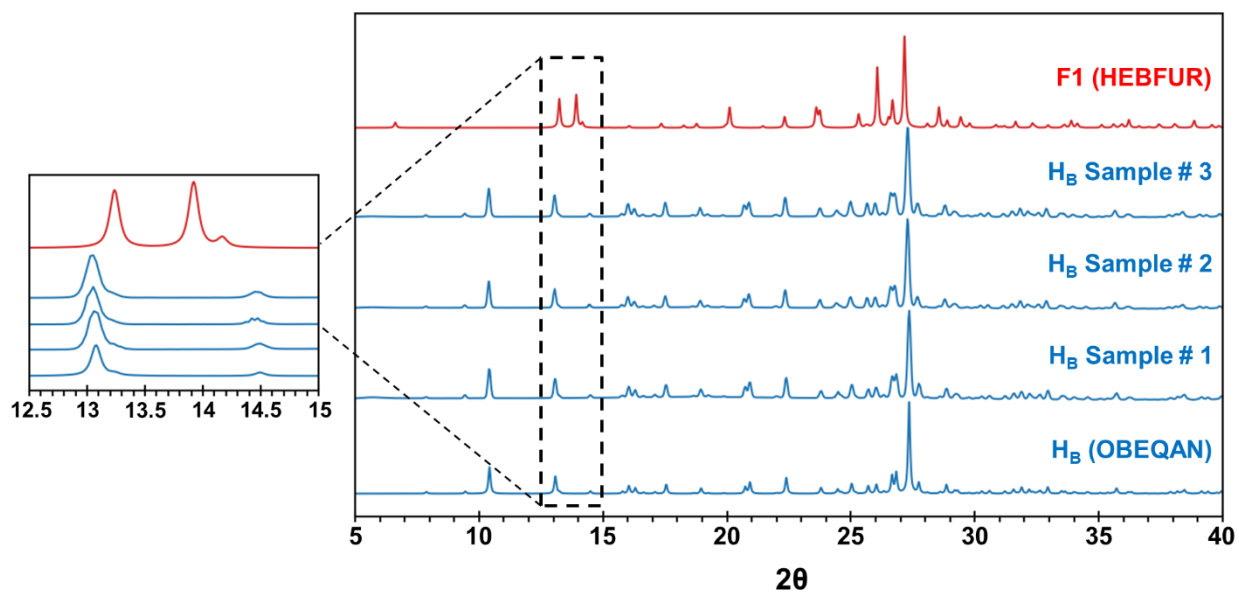

**Figure S11.** sPXRD of three different ground batches of H<sub>B</sub> compared against the PXRD patterns of HB and F1 simulated from the single crystal structures. (left) A zoomed view of the region where high intensity peaks would be expected if F1 was present in the samples.

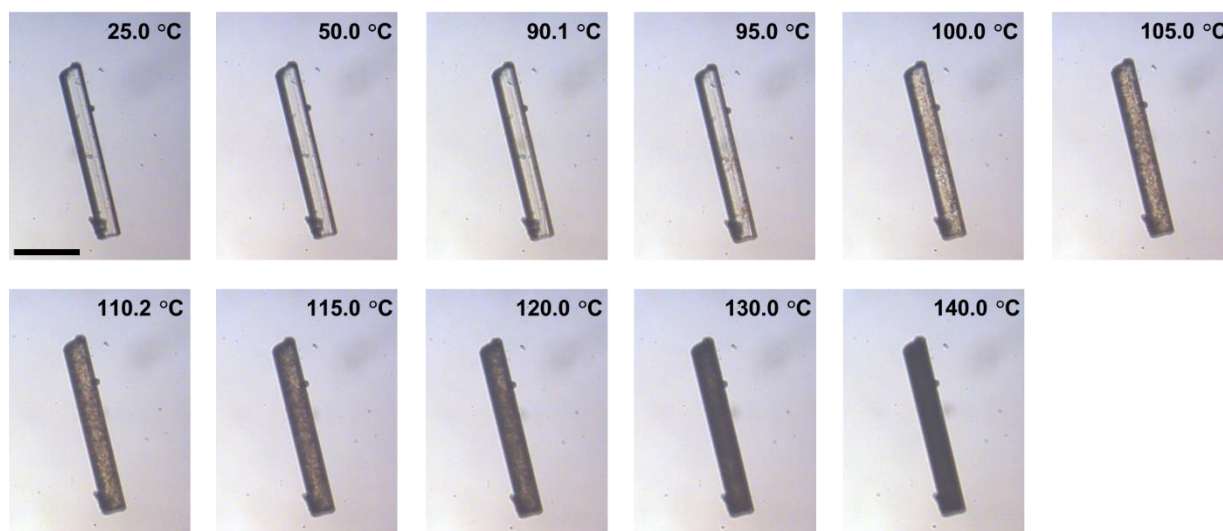

**Figure S12.** Hot-stage microscopy optical images of H<sub>B</sub> ramped at 5 °C/min from room temperature to 150 °C. At approximately 95 °C dark spots begin to appear across the surface until 140 °C whereupon optical changes can no longer be observed. Scale bar = 100 μm.

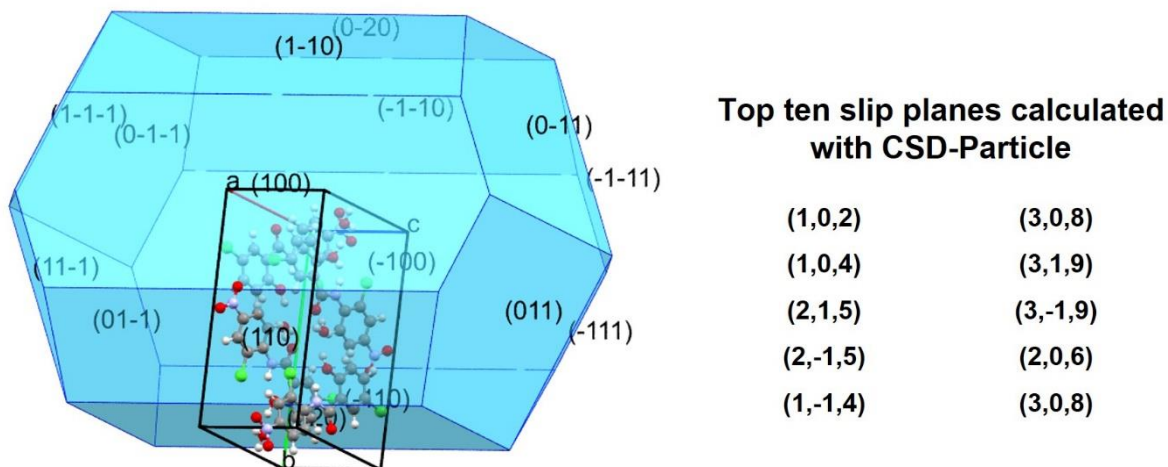

**Figure S13.** (left) Calculated BFDH morphology and (right) top ten slip planes calculated using the CSD-Particle module in the Cambridge Structural Database. None of the calculated slip planes correspond to the natural faces.

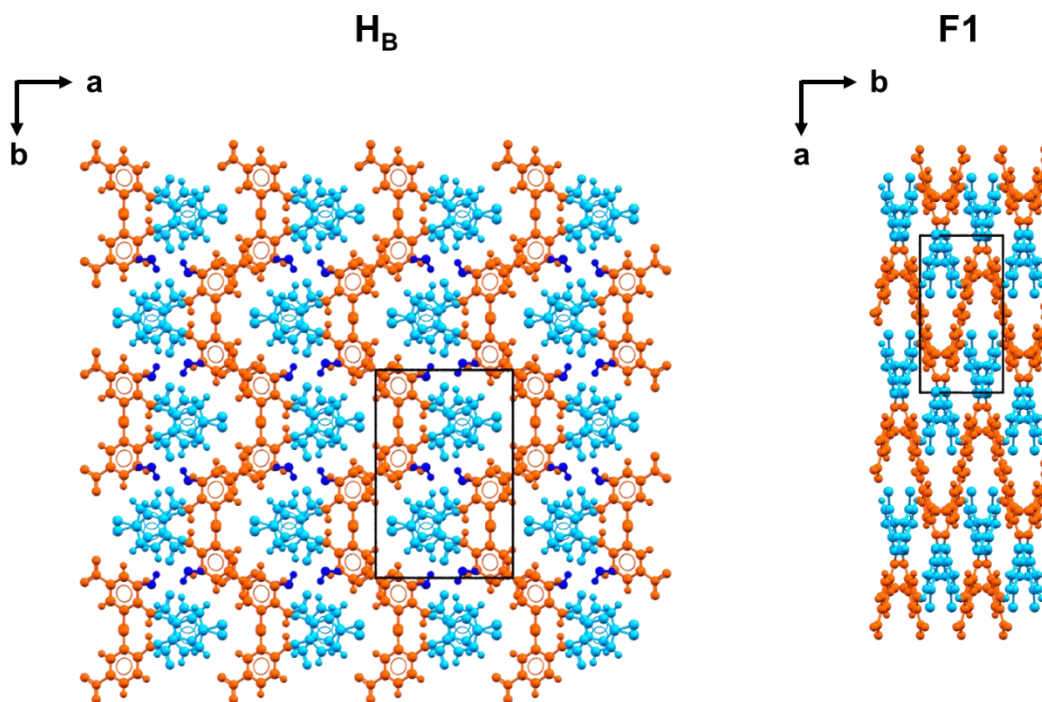

**Figure S14.** Schematic of packing in H<sub>B</sub> and F1. Each NCL molecule is colored so that the nitrophenyl ring is orange and the phenol ring is light blue. Water molecules in H<sub>B</sub> are dark blue.
